# Supplementary material for: Aqueous nickel sequestration and release during structural Fe(ii) hydroxide remediation: the roles of coprecipitation, reduction and substitution
Source: Royal Society of Chemistry journal article supplement (doi:10.1039/c6ra16299a), 2016-01-01
Supplement: c6ra16299a1.pdf [file c6ra16299a1.pdf]

## Supporting information

### Aqueous nickel sequestration and release during structural Fe(II) hydroxides remediation: the roles of coprecipitation, reduction and substitution

Binbin Shao<sup>a</sup>, Ying Chen<sup>a</sup>, Deli Wu<sup>\*a</sup>, Hongping He<sup>a</sup>, Chaomeng Dai<sup>b</sup>, Yalei Zhang<sup>a</sup>

<sup>a</sup>State Key Laboratory of Pollution Control and Resources Reuse, College of Environmental Science & Engineering, Tongji University, Shanghai, 200092, P.R. China

<sup>b</sup>College of Civil Engineering, Tongji University, Shanghai 200092, P.R. China

\*Corresponding author. Tel.: +86 02165984569; E-mail: wudeli@tongji.edu.cn

**Table S1:** pH variations of SFH-Ni<sup>2+</sup> mixture in the presence and absence of anions

**Text S1:** Comparison of the  $K_{sp}$  of  $Ni_xFe_{(1-x)}(OH)_2$  and  $Fe^{III}_{(1+2x/3)}Fe^{II}_{(1-x)}(OH)_5$  precipitations

**Text S2:** Determination of  $E(Ni^{2+}/Ni)$  and  $E(NO_3^-/NO)$  based on the conditions of the corresponding system

**Fig. S1:** SEM images of solid phases of (a) SFH(1:1) (b) SFH(1:2) (c) SFH(1:3)

**Fig. S2:** Adsorption of Ni(II) on SFH under anoxic conditions (SFH = 0.1 g/L; initial Ni<sup>2+</sup> concentration = 2.0–250 mg/L; contact time = 20 min; at 25 °C)

**Fig. S3:** Effect of (dissolved oxygen) DO on Ni(II) removal by SFH(1:2)

(Initial Ni<sup>2+</sup>=100 mg/L, SFH = 2 mM)

**Fig. S4:** XRD pattern of oxidized solid product of SFH(1:2) with NO<sub>3</sub><sup>-</sup> (SFH= 2 mM, NO<sub>3</sub><sup>-</sup>/Fe<sup>2+</sup>=10:1)

**Fig. S5:** FT-IR spectra of SFH(1:2) and PO<sub>4</sub><sup>3-</sup> or CO<sub>3</sub><sup>2-</sup> loaded SFH(1:2)

Table S1 pH variations of SFH-Ni<sup>2+</sup> mixture in the presence and absence of anions

| <b>Conditions</b>                        |      | <b>Initial pH</b> | <b>End pH (60 min)</b> |
|------------------------------------------|------|-------------------|------------------------|
| SFH(2:1)-Ni <sup>2+</sup>                |      | 6.6               | 5.8                    |
| SFH(1:1)-Ni <sup>2+</sup>                |      | 7.9               | 6.2                    |
| SFH(1:2)-Ni <sup>2+</sup>                |      | 9.1               | 6.7                    |
| SFH(1:3)-Ni <sup>2+</sup>                |      | 11.2              | 10.2                   |
| SFH(1:4)-Ni <sup>2+</sup>                |      | 11.6              | 10.8                   |
| Ni(OH) <sub>2</sub> -Fe <sup>2+</sup>    |      | 10.5              | 10.2                   |
| Ni(OH) <sub>2</sub> -Fe <sup>3+</sup>    |      | 10.5              | 9.3                    |
| CO <sub>3</sub> <sup>2-</sup> / SFH(1:2) | 1:10 | 9.2               | 8.1                    |
|                                          | 1:1  | 9.9               | 8.6                    |
|                                          | 10:1 | 10.5              | 9.1                    |
| PO <sub>4</sub> <sup>3-</sup> / SFH(1:2) | 1:10 | 9.1               | 8.0                    |
|                                          | 1:1  | 9.6               | 8.4                    |
|                                          | 10:1 | 10.9              | 9.6                    |
| NO <sub>3</sub> <sup>-</sup> / SFH(1:2)  | 1:10 | 9.0               | 6.5                    |
|                                          | 1:1  | 8.9               | 5.8                    |
|                                          | 10:1 | 8.7               | 5.1                    |

**Text S1. Comparison of the  $K_{sp}$  of  $Ni_xFe_{(1-x)}(OH)_2$  and  $Fe^{III}_{(1+2x/3)}Fe^{II}_{(1-x)}(OH)_5$  precipitations**

For the two precipitates, the precipitation-dissolution equilibrium could be described as:

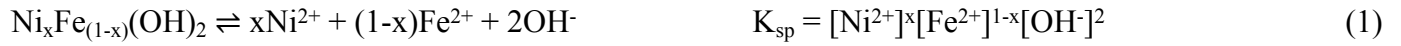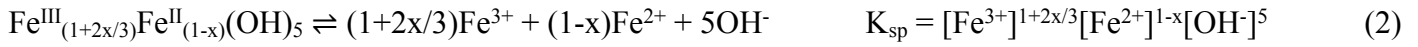

where  $[Ni^{2+}]$ ,  $[Fe^{2+}]$ ,  $[Fe^{3+}]$  and  $[OH^-]$  are the concentrations of dissolved  $Ni^{2+}$ ,  $Fe^{2+}$ ,  $Fe^{3+}$  and  $OH^-$ , respectively, and  $K_{sp}$  is the solubility product. Based on the  $K_{sp}$  of  $Fe(OH)_2$ ,  $Ni(OH)_2$  and  $Fe(OH)_3$ ,

$$K_{sp}[Fe(OH)_2] = [Fe^{2+}][OH^-]^2 = 8.0 \times 10^{-16} \quad (3)$$

$$K_{sp}[Ni(OH)_2] = [Ni^{2+}][OH^-]^2 = 2.0 \times 10^{-15} \quad (4)$$

$$K_{sp}[Fe(OH)_3] = [Fe^{3+}][OH^-]^3 = 4.0 \times 10^{-38} \quad (5)$$

eq 1 could be rewritten as eq 6.

$$\begin{aligned} K_{sp}[Ni_xFe_{(1-x)}(OH)_2] &= [Ni^{2+}]^x[Fe^{2+}]^{1-x}[OH^-]^2 \\ &= \frac{K_{sp}[Ni(OH)_2]^x}{K_{sp}[Fe(OH)_2]^{1-x}} \end{aligned} \quad (6)$$

Note that  $0 < x < 1$  and  $\frac{K_{sp}[Ni(OH)_2]}{K_{sp}[Fe(OH)_2]} = 2.5 > 1$ , thus

$$8.0 \times 10^{-16} < K_{sp}[Ni_xFe_{(1-x)}(OH)_2] < 2.0 \times 10^{-15}.$$

Similarly, eq 2 could be rewritten as eq 7.

$$\begin{aligned} K_{sp}[Fe^{III}_{(1+2x/3)}Fe^{II}_{(1-x)}(OH)_5] &= [Fe^{3+}]^{1+2x/3}[Fe^{2+}]^{1-x}[OH^-]^5 \\ &= \frac{K_{sp}[Fe(OH)_3]^{1+2x/3} \cdot K_{sp}[Fe(OH)_2]^{1-x}}{K_{sp}[Fe(OH)_2]^5} \end{aligned} \quad (7)$$

Note that  $-1.5 < x < 1$  and  $\frac{K_{sp}[Fe(OH)_3]^{1+2x/3} \cdot K_{sp}[Fe(OH)_2]^{1-x}}{K_{sp}[Fe(OH)_2]^5} = 1.5 \times 10^{-10} < 1$ , thus

$$4.7 \times 10^{-63} < K_{sp}[Fe^{III}_{(1+2x/3)}Fe^{II}_{(1-x)}(OH)_5] < 1.7 \times 10^{-38}.$$

Based on the calculations:  $K_{sp}[Fe^{III}_{(1+2x/3)}Fe^{II}_{(1-x)}(OH)_5] \ll K_{sp}[Ni_xFe_{(1-x)}(OH)_2]$ , thus the substitution of  $Ni^{2+}$  in  $Ni_xFe_{(1-x)}(OH)_2$  by  $Fe^{3+}$  is favorable:

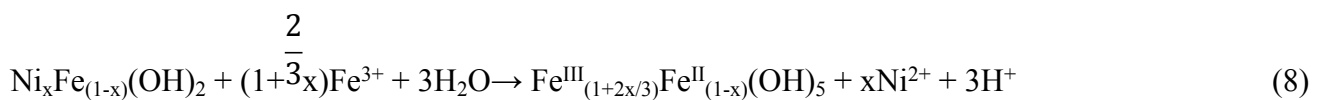

**Text S2. Determination of E(Ni<sup>2+</sup>/Ni) and E(NO<sub>3</sub><sup>-</sup>/NO) based on the conditions of the corresponding system**

The electrode reaction for Ni<sup>2+</sup> reduction could be described as:

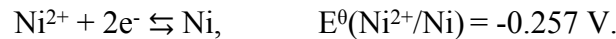

Under alkaline circumstance, E(Ni<sup>2+</sup>/Ni) could be expressed as follows using Nernst equation,

$$\begin{aligned} E(\text{Ni}^{2+}/\text{Ni}) &= E^\theta(\text{Ni}^{2+}/\text{Ni}) + \frac{0.059 \text{ V}}{2} \lg[\text{Ni}^{2+}] \\ &= E^\theta(\text{Ni}^{2+}/\text{Ni}) + \frac{0.059 \text{ V}}{2} \lg \text{Error!} \end{aligned}$$

Note that the initial solution pH of Ni<sup>2+</sup> with SFH(1:2) is 9.05, thus the concentration of OH<sup>-</sup> is 10<sup>-4.95</sup> M.

Therefore,

$$E(\text{Ni}^{2+}/\text{Ni}) = -0.257 \text{ V} + \frac{0.059 \text{ V}}{2} \frac{2.0 \times 10^{-15}}{10^{-9.9}} = -0.398 \text{ V}.$$

The reduction of NO<sub>3</sub><sup>-</sup> by structural Fe(II) could generate NO<sub>2</sub><sup>-</sup> and subsequent various products, including NO<sub>2</sub><sup>-</sup>, NO, NO<sub>2</sub> and NH<sub>4</sub><sup>+</sup>. Our previous study showed that NO<sub>x</sub> were the predominant products at initial pH ~8 and Fe/N of 10:1. The conditions are similar to that in present study. Here, we take NO as a product of NO<sub>3</sub><sup>-</sup> reduction. Under alkaline circumstance, The electrode reaction for NO<sub>3</sub><sup>-</sup> reduction could be described as:

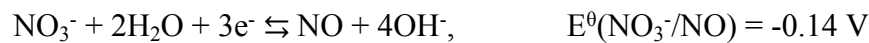

E(NO<sub>3</sub><sup>-</sup>/NO) could be expressed as follows using Nernst equation,

$$\begin{aligned} E(\text{NO}_3^-/\text{NO}) &= E^\theta(\text{NO}_3^-/\text{NO}) + \frac{0.059 \text{ V}}{3} \lg \text{Error!} \\ &= E^\theta(\text{NO}_3^-/\text{NO}) + \frac{0.059 \text{ V}}{3} \lg \frac{[\text{NO}_3^-]}{[\text{OH}^-]^4} - \frac{0.059 \text{ V}}{3} \lg(p(\text{NO})/p^\theta). \end{aligned}$$

Note that the concentration of NO<sub>3</sub><sup>-</sup> and OH<sup>-</sup> are 0.02 M and 10<sup>-4.95</sup> M, respectively. Thereby,

$$E(\text{NO}_3^-/\text{NO}) = 0.216 \text{ V} - \frac{0.059 \text{ V}}{3} \lg(p(\text{NO})/p^\theta).$$

Assuming that the concentration of NO is equal to that of initial NO<sub>3</sub><sup>-</sup> (0.02 M), then  $p(\text{NO}) = nRT/V = 0.02 \times 8.3145 \times 273 / (0.1 \times 10^{-4}) = 4540 \text{ kpa}$ . (The parameters of T and V could be seen in *section 2.2*, and  $p^\theta = 100 \text{ kpa}$ ). Thus,

$$\frac{0.059 \text{ V}}{3} \lg(p(\text{NO})/p^\theta) = 0.032 \text{ V},$$

which is much less than 0.216 V. So it is determined that

$$E(\text{NO}_3^-/\text{NO}) \approx 0.216 \text{ V.}$$

By correcting  $E(\text{Ni}^{2+}/\text{Ni})$  and  $E(\text{NO}_3^-/\text{NO})$  to the corresponding system, we find that  $E(\text{NO}_3^-/\text{NO})$  is higher than  $E(\text{Ni}^{2+}/\text{Ni})$ . It indicates that  $\text{NO}_3^-$  would be easier than  $\text{Ni}^{2+}$  to be reduced by SFH.

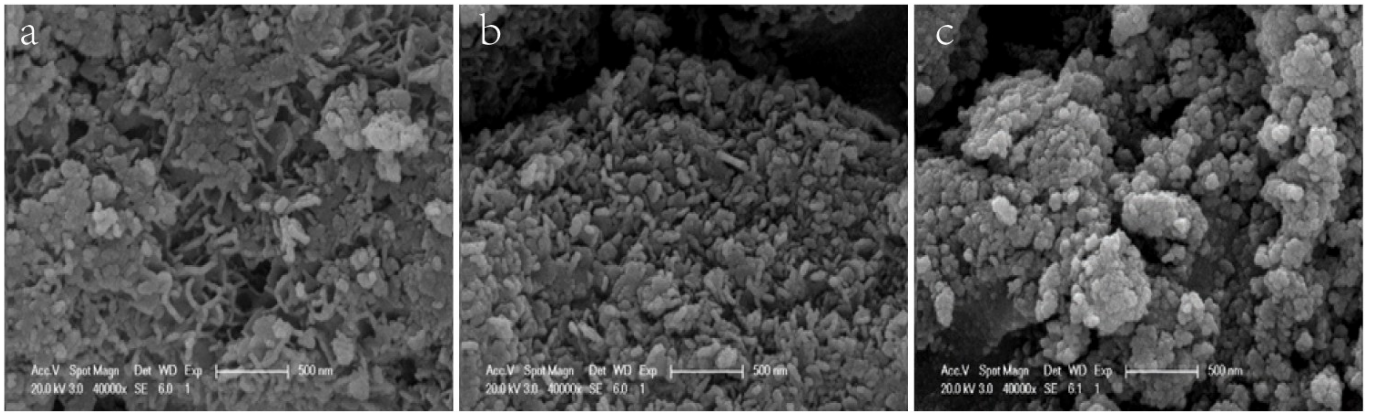

**Fig. S1** SEM images of solid phases of (a) SFH(1:1) (b) SFH(1:2) (c) SFH(1:3)

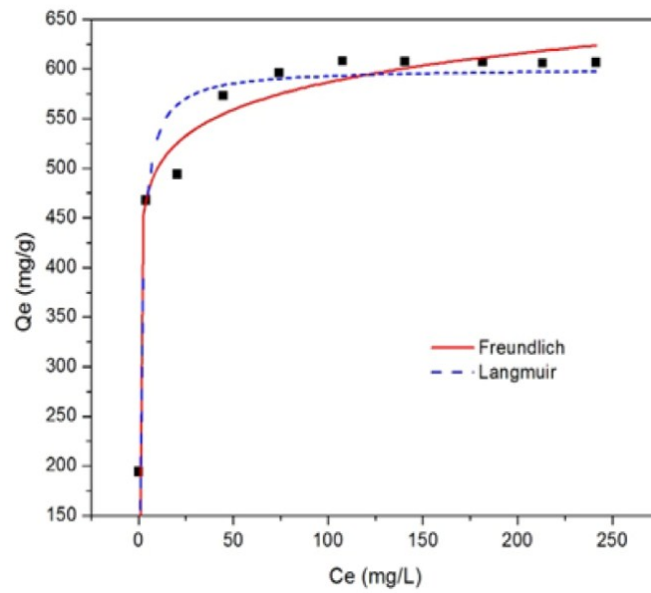

**Fig. S2** Adsorption of Ni(II) on SFH under anoxic conditions (SFH = 0.1 g/L; initial Ni<sup>2+</sup> concentration = 2.0–250 mg/L; contact time = 20 min; at 25 °C).

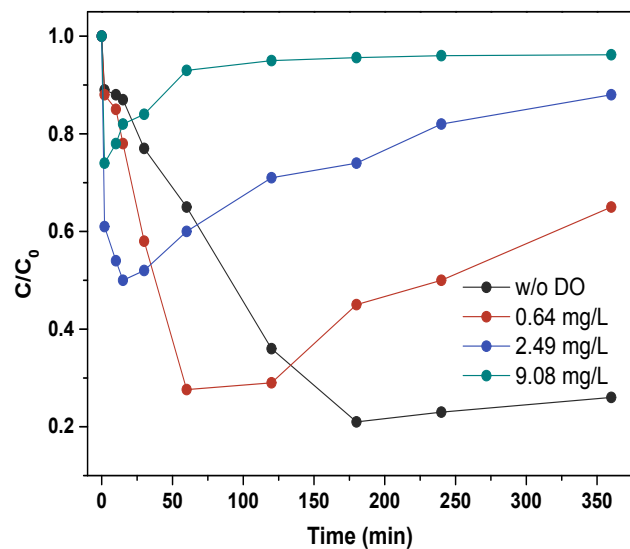

**Fig. S3** Effect of dissolved oxygen (DO) on Ni(II) removal by SFH(1:2) ((Initial Ni<sup>2+</sup>=100 mg/L, SFH = 2.0 mM)

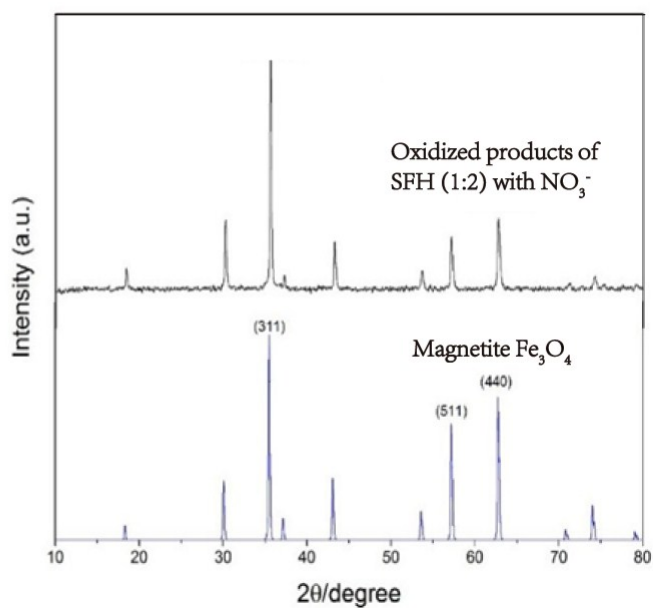

**Fig. S4** XRD pattern of oxidized solid product of SFH(1:2) with NO<sub>3</sub><sup>-</sup> (SFH=0.11 g/L, NO<sub>3</sub><sup>-</sup>/Fe<sup>2+</sup>=10:1)



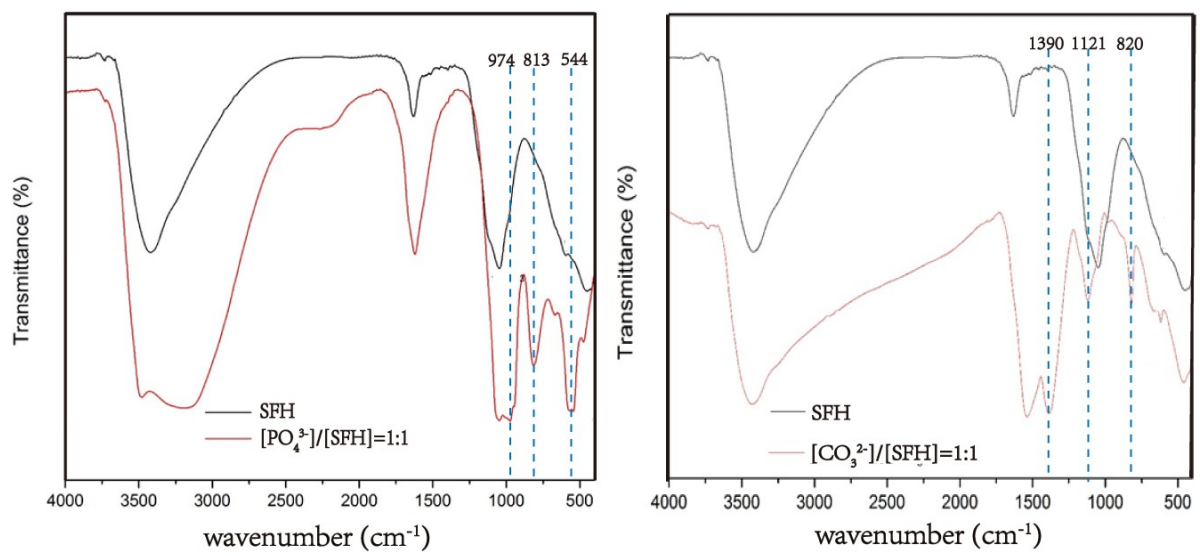

**Fig. S5** FT-IR spectra of SFH(1:2) and PO<sub>4</sub><sup>3-</sup> or CO<sub>3</sub><sup>2-</sup> loaded SFH(1:2)
